# Supplementary material for: A new dual-ligand DUT-52-type metal–organic framework for ratiometric luminescence detection of aqueous-phase Cu2+ and Cr2O72−
Source: Royal Society of Chemistry journal article supplement (doi:10.1039/d3dt01590d), 2023-01-01
Supplement: d3dt01590d1.pdf [file d3dt01590d1.pdf]

**Supplementary material**

**A new Dual-Ligand DTU-52-Type Metal–Organic Framework For Ratiometric Luminescent Detection of Aqueous-Phase Cu<sup>2+</sup> and Cr<sub>2</sub>O<sub>7</sub><sup>2-</sup>**

*Xue Wen <sup>a</sup>, Wenjun Zhang\* <sup>a</sup>, Cong Ding <sup>a</sup> Zhongfa Li <sup>a</sup>, Chengyue Xin <sup>a</sup>*

<sup>a</sup> **School of Chemical Engineering, Hebei University of Technology**

**Tianjin, 300130, China.**

**\* E-mail: [wjzhang@hebut.edu.cn](mailto:wjzhang@hebut.edu.cn)**

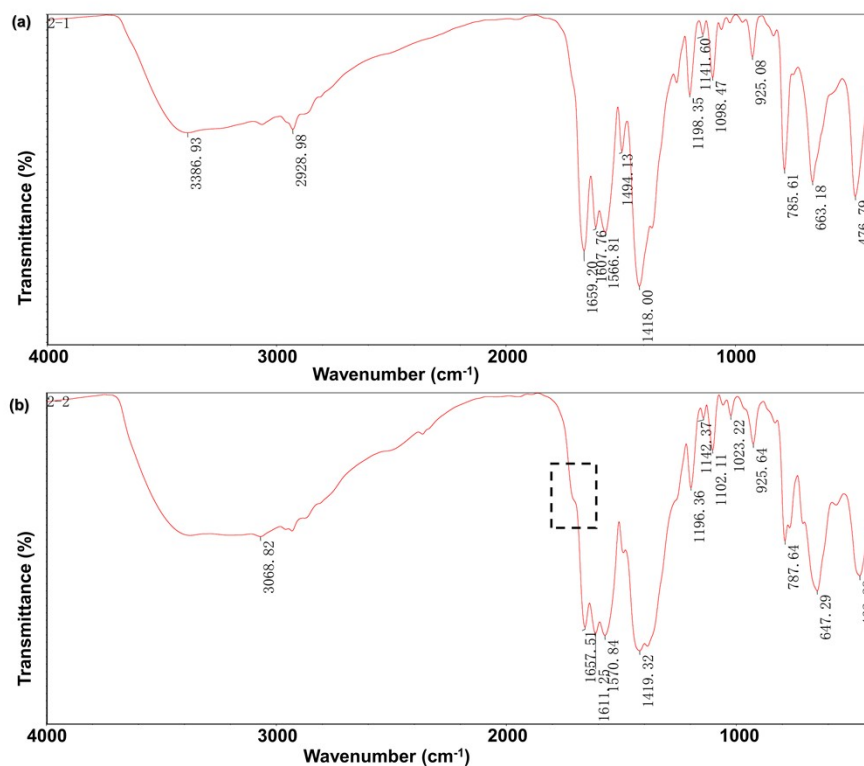

**Figure S1.** FT-IR spectra of (a) DTU-52 and (b) DUT-52-COOH.

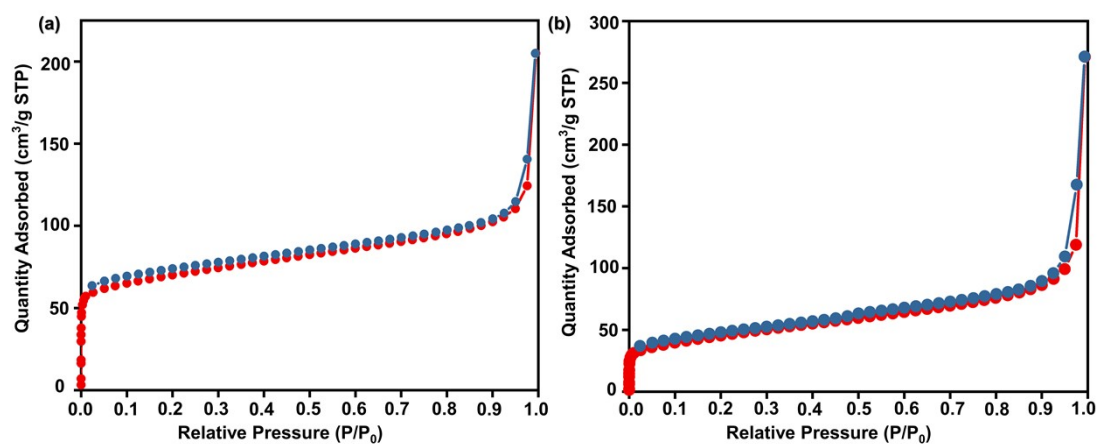

**Figure S2.** N<sub>2</sub> adsorption isotherms of (a) DUT-52-COOH and (b) Eu<sup>3+</sup>/DUT-52-COOH.
