# Supplementary material for: A new dual-ligand DUT-52-type metal–organic framework for ratiometric luminescence detection of aqueous-phase Cu2+ and Cr2O72−
Source: Royal Society of Chemistry journal article supplement (doi:10.1039/d3dt01590d), 2023-01-01
Supplement: d3dt01590d2.pdf [file d3dt01590d2.pdf]

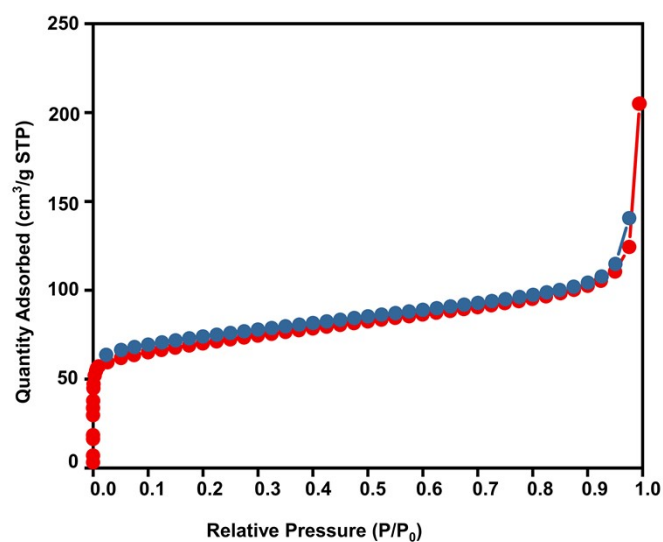

**Figure S3.** N<sub>2</sub> adsorption isotherms of DUT-52.

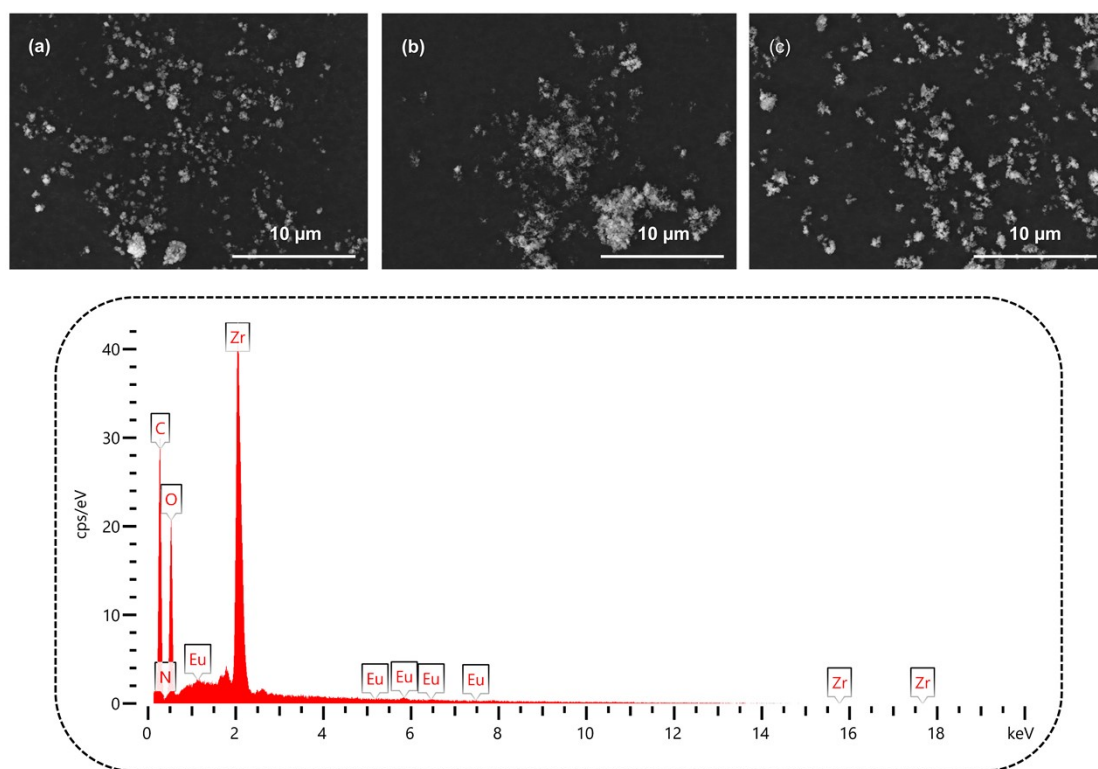

**Figure S4.** Scanning electron microscopy (SEM) image of (a) DUT-52, (b) DUT-52-COOH and (c) Eu<sup>3+</sup>/DUT-52-COOH. The EDX patterns of Eu<sup>3+</sup>/DUT-52-COOH.
