# Supplementary material for: A new dual-ligand DUT-52-type metal–organic framework for ratiometric luminescence detection of aqueous-phase Cu2+ and Cr2O72−
Source: Royal Society of Chemistry journal article supplement (doi:10.1039/d3dt01590d), 2023-01-01
Supplement: d3dt01590d3.pdf [file d3dt01590d3.pdf]

Table S1 EDX analysis of Eu<sup>3+</sup>/ DUT-52-COOH.

| Element | Wt%   | Wt% Sigma | At%   |
|---------|-------|-----------|-------|
| C K     | 52.56 | 0.40      | 73.15 |
| N K     | 0.00  | 0.70      | 0.00  |
| O K     | 21.15 | 0.29      | 22.10 |
| Zr L    | 25.32 | 0.29      | 4.64  |
| Eu L    | 0.98  | 0.20      | 0.11  |

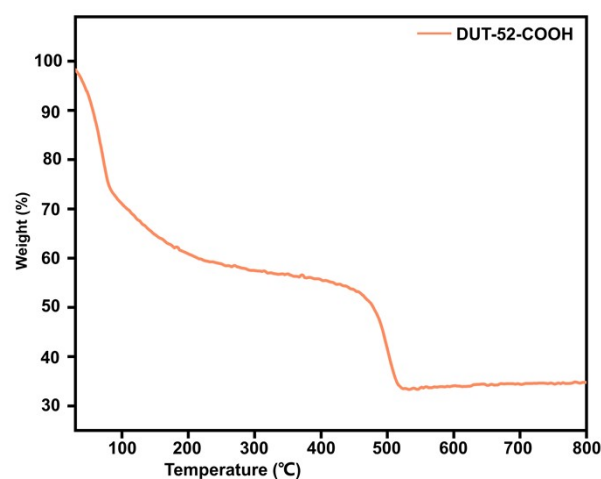

**Figure S5.** TGA curves of the DUT-52-COOH.

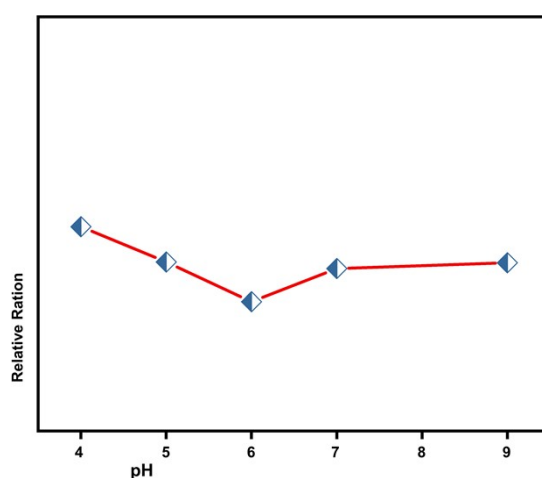

**Figure S6.** The relative luminescence ratio of Eu<sup>3+</sup>/DUT-52-COOH composite dispersed in different pH.

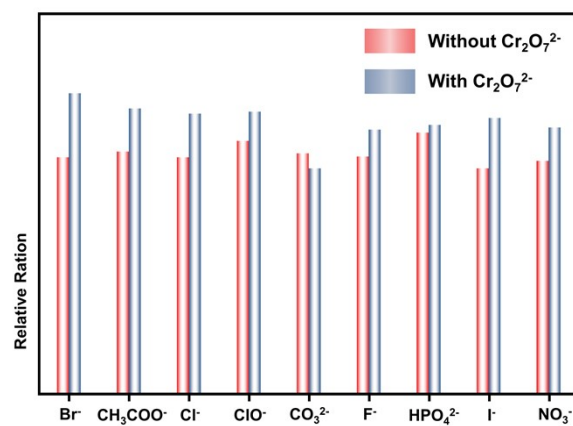

**Figure S7.** The relative luminescence ratio of  $\text{Eu}^{3+}$ /DUT-52-COOH composite with and without  $\text{Cr}_2\text{O}_7^{2-}$  in the presence of other anions in aqueous solutions under excitation wavelength at 371 nm.
