# Supplementary material for: A new dual-ligand DUT-52-type metal–organic framework for ratiometric luminescence detection of aqueous-phase Cu2+ and Cr2O72−
Source: Royal Society of Chemistry journal article supplement (doi:10.1039/d3dt01590d), 2023-01-01
Supplement: d3dt01590d4.pdf [file d3dt01590d4.pdf]

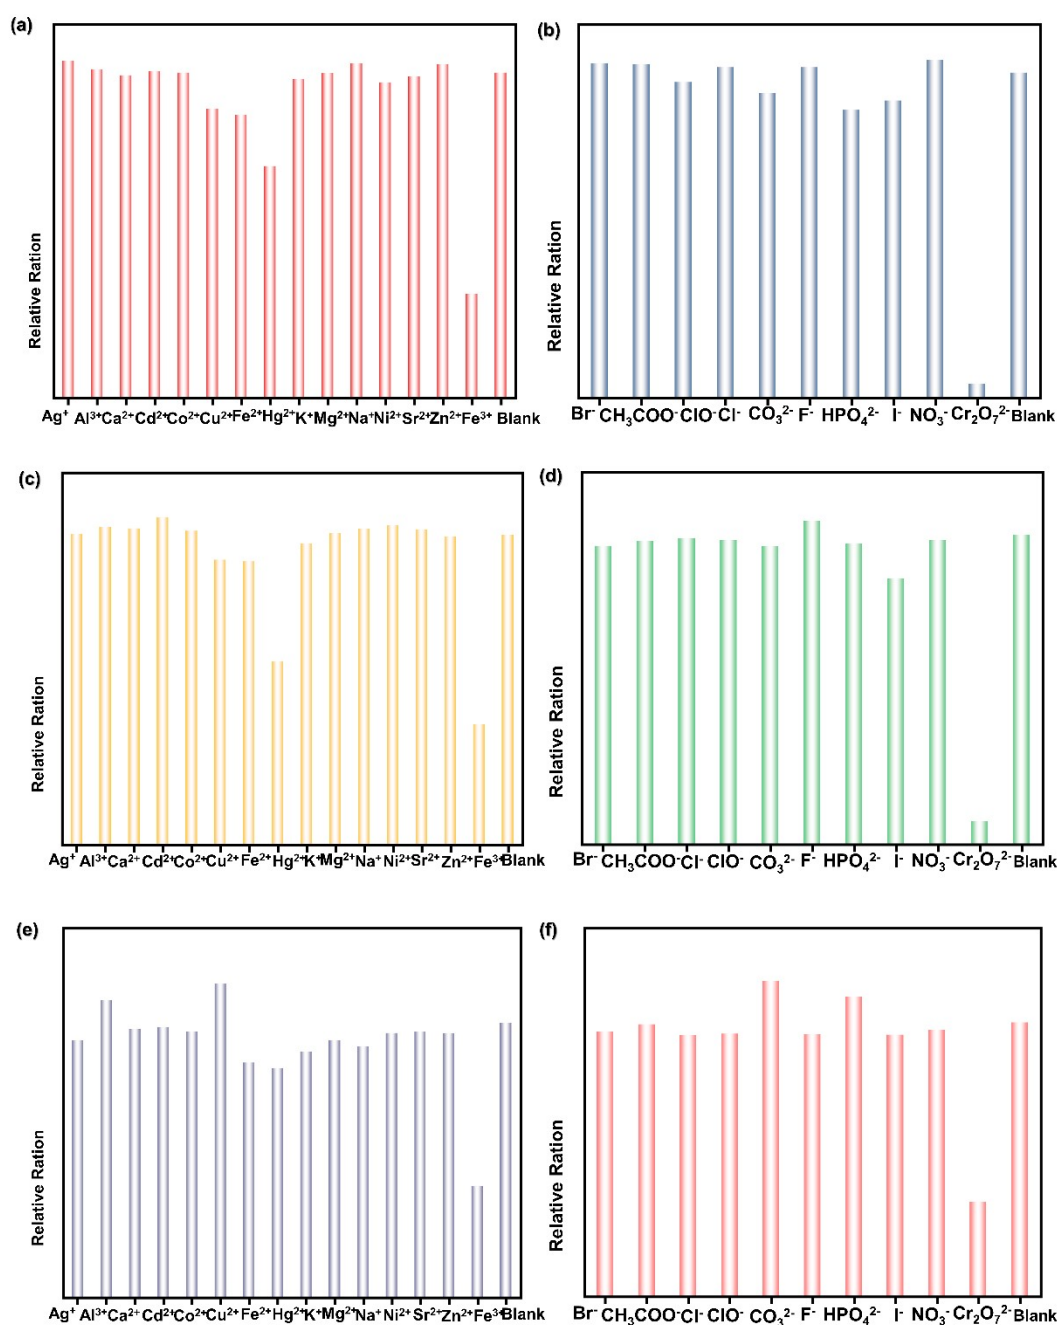

**Figure S8.** Relative ratio of (a) DUT-52-COOH composite dispersed in aqueous solutions with different metal cations (1 mM). (b) DUT-52-COOH composite dispersed in aqueous solutions with different anions (1 mM). (c) DUT-52 composite dispersed in aqueous solutions with different metal cations (1 mM). (d) DUT-52 composite dispersed in aqueous solutions with different anions (1 mM). (e)  $\text{H}_2\text{NDC}$  dispersed in aqueous solutions with different metal cations (1 mM). (f)  $\text{H}_2\text{NDC}$  composite dispersed in aqueous solutions with different anions (1 mM).
