# Supplementary material for: A new dual-ligand DUT-52-type metal–organic framework for ratiometric luminescence detection of aqueous-phase Cu2+ and Cr2O72−
Source: Royal Society of Chemistry journal article supplement (doi:10.1039/d3dt01590d), 2023-01-01
Supplement: d3dt01590d5.pdf [file d3dt01590d5.pdf]

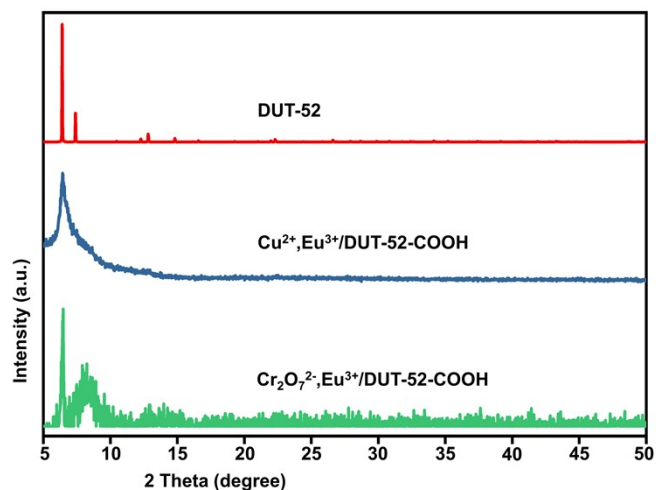

**Figure S9.** XRD patterns of DUT-52 and Cu<sup>2+</sup>, Eu<sup>3+</sup>/DUT-52-COOH composite and Cr<sub>2</sub>O<sub>7</sub><sup>2-</sup>, Eu<sup>3+</sup>/DUT-52-COOH.

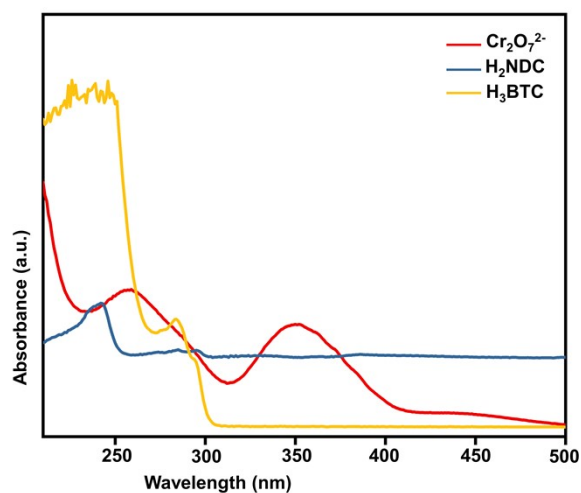

**Figure S10.** Spectral overlap between absorption spectra of the ligands of Eu<sup>3+</sup>/DUT-52-COOH and Cr<sub>2</sub>O<sub>7</sub><sup>2-</sup> ions in water.

**Table S2.** Performance comparison between other sensors based on MOFs for Cu<sup>2+</sup> ions

| Sensor                                                                                                                                                          | Detection Limits | Ref.      |
|-----------------------------------------------------------------------------------------------------------------------------------------------------------------|------------------|-----------|
| CDs@Eu-DPA                                                                                                                                                      | 26.3 nM          | 44        |
| Zn <sub>3</sub> (μ <sub>3</sub> -Hbptc) <sub>2</sub> (μ <sub>2</sub> -4,4'-bpy) <sub>2</sub> (H <sub>2</sub> O) <sub>4</sub> ] <sub>n</sub> ·2nH <sub>2</sub> O | 32.4 nM          | 45        |
| Eu-DATA/BDC                                                                                                                                                     | 0.15 μM          | 25        |
| [Zn <sub>1.5</sub> (dttz)(Hdpa)] <sub>n</sub>                                                                                                                   | 1.66 μM          | 46        |
| Tb-MOFs                                                                                                                                                         | 10 μM            | 47        |
| TMU-16                                                                                                                                                          | 62 μM            | 32        |
| Eu <sup>3+</sup> /DUT-52-COOH                                                                                                                                   | 3.43 μM          | This work |

**Table S3.** Performance comparison between other sensors based on MOFs for Cr<sub>2</sub>O<sub>7</sub><sup>2-</sup> ions

| Sensor                                                                                                                                         | Detection Limits or quenching constants                   | Ref.      |
|------------------------------------------------------------------------------------------------------------------------------------------------|-----------------------------------------------------------|-----------|
| [Eu <sub>2</sub> (HICA)(BTEC)(H <sub>2</sub> O) <sub>2</sub> ] <sub>n</sub>                                                                    | K <sub>sv</sub> = 1.141 × 10 <sup>4</sup> M <sup>-1</sup> | 48        |
| [Tb <sub>2</sub> (HICA)-(BTEC)(H <sub>2</sub> O) <sub>2</sub> ]·2.5H <sub>2</sub> O] <sub>n</sub>                                              | K <sub>sv</sub> = 8.23 × 10 <sup>3</sup> M <sup>-1</sup>  |           |
| R@D3                                                                                                                                           | K <sub>sv</sub> = 4.7 × 10 <sup>4</sup> M <sup>-1</sup>   | 29        |
| [Zr <sub>6</sub> O <sub>4</sub> (OH) <sub>4</sub> L <sub>4</sub> (H <sub>2</sub> O) <sub>2</sub> (HCOO) <sub>4</sub> ]·9DMF·12H <sub>2</sub> O | K <sub>sv</sub> =4.99 × 10 <sup>4</sup> M <sup>-1</sup>   | 49        |
| [Tb <sub>10</sub> (DBA) <sub>6</sub> (OH) <sub>4</sub> (H <sub>2</sub> O) <sub>5</sub> ]·(H <sub>3</sub> O) <sub>4</sub>                       | LOD= 10 <sup>-9</sup> M                                   | 50        |
| [Eu <sub>7</sub> (mtb) <sub>5</sub> (H <sub>2</sub> O) <sub>16</sub> ]·NO <sub>3</sub> 8DMA·18H <sub>2</sub> O                                 | LOD=5.73 nM                                               | 51        |
| Dyes⊂MOF-801                                                                                                                                   | LOD=0.03 mM                                               | 52        |
| Eu <sup>3+</sup> /DUT-52-COOH                                                                                                                  | LOD=25.7 nM                                               | This work |
